# Supplementary material
Source: PubMed Central journal article supplement (PMC6428601)

**SUPPLEMENTAL FIGURE 1.** Patient stratification and treatment courses according to disease stage.

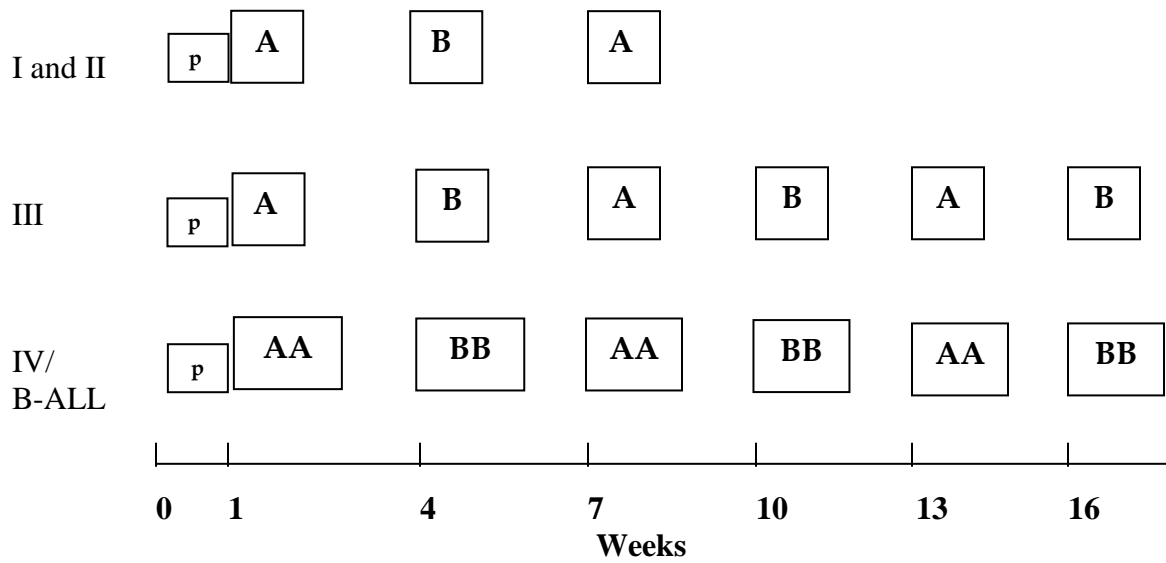

Supplement: NIHMS1006470-supplement-Supp_FigS1.pdf [file NIHMS1006470-supplement-Supp_FigS1.pdf]
